# Supplementary material for: Highly-efficient solution-processed green phosphorescent organic light-emitting diodes with reduced efficiency roll-off using ternary blend hosts
Source: Royal Society of Chemistry journal article supplement (doi:10.1039/c9tc02701g), 2019-01-01
Supplement: c9tc02701g1.pdf [file c9tc02701g1.pdf]

# **Highly-efficient solution-processed green phosphorescent organic light-emitting diodes with reduced efficiency roll-off using ternary blend hosts**

Jianhua Zhang<sup>1</sup>, Yuxin Guan<sup>1</sup>, Jiali Yang<sup>1</sup>, Wenqiang Hua<sup>2</sup>, Shuanglong Wang<sup>1</sup>, Zhitian Ling<sup>1</sup>, Hong Lian<sup>1</sup>, Yingjie Liao<sup>1</sup>, Weixia Lan<sup>1</sup>, Bin Wei<sup>1,\*</sup>, Wai-Yeung Wong<sup>3,\*</sup>

<sup>1</sup>Key Laboratory of Advanced Display and System Applications, Ministry of Education, School of Mechatronic Engineering and Automation, Shanghai University, Shanghai, 200072, China.

<sup>2</sup>Shanghai Advanced Research Institute, Chinese Academy of Sciences

<sup>3</sup>Institute of Molecular Functional Materials and Department of Applied Biology and Chemical Technology, The Hong Kong Polytechnic University, Hung Hom, Kowloon, Hong Kong, China

Corresponding Author

Email: [bwei@shu.edu.cn](mailto:bwei@shu.edu.cn) and [wai-yeung.wong@polyu.edu.hk](mailto:wai-yeung.wong@polyu.edu.hk)

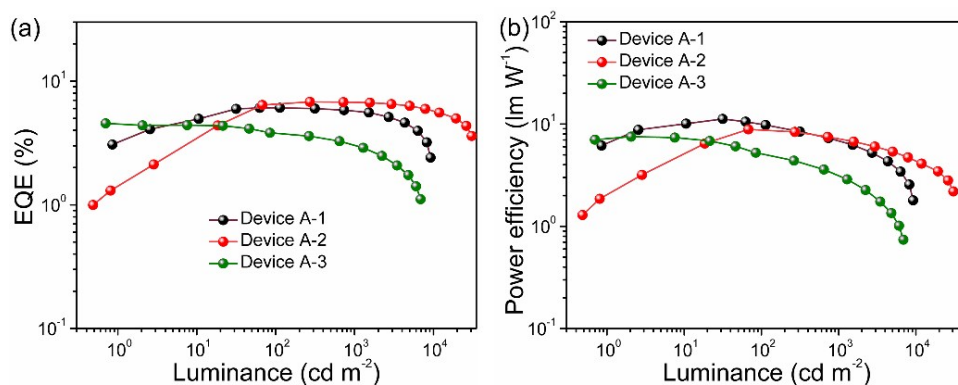

Figure S1. The EQE-L (left) and PE-L (right) characteristics for single host based devices.

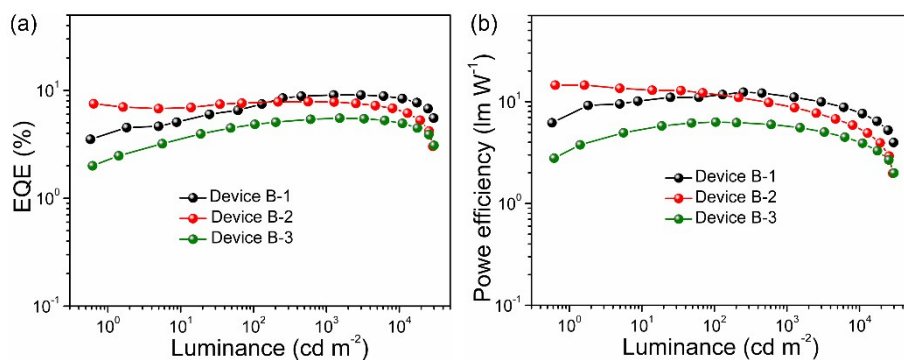

Figure S2. The EQE-L (left) and PE-L (right) characteristics for binary hosts based devices.

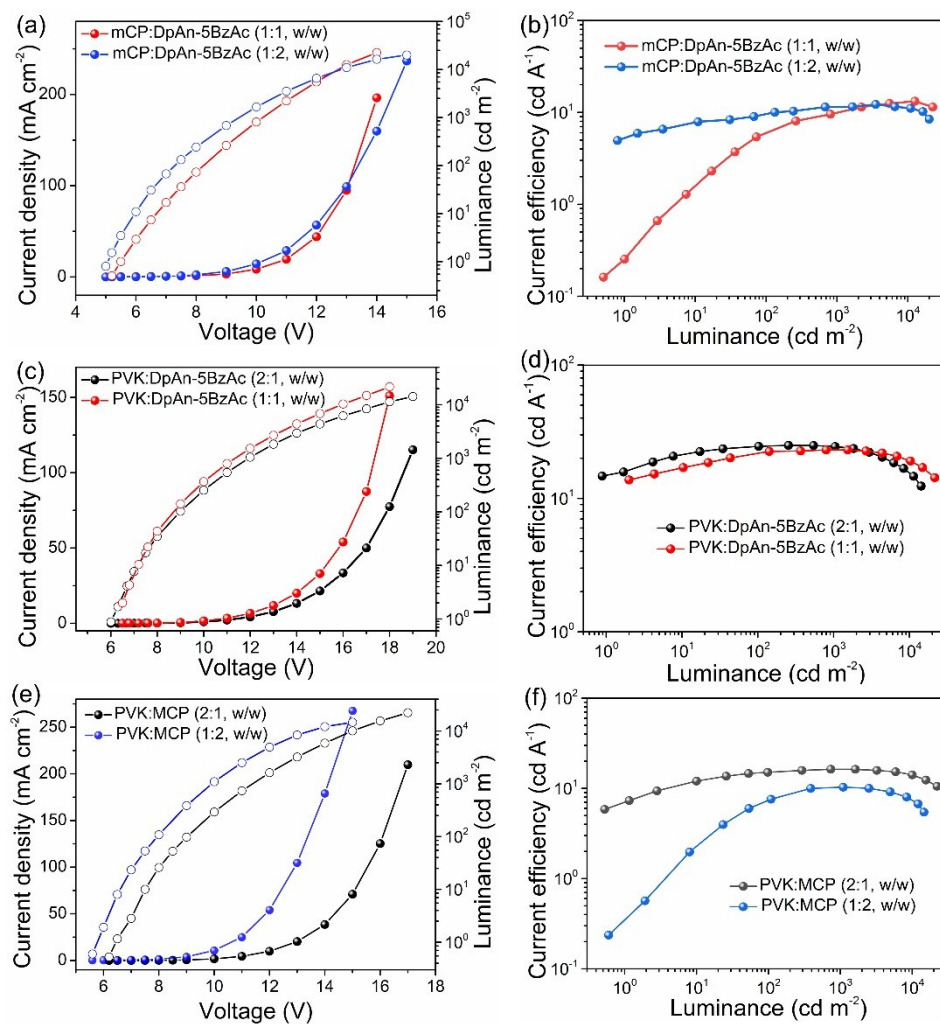

Figure S3. The current density-luminance-voltage (left) and current efficiency versus luminance (right) characteristics for Devices B-1 (a and b), B-2 (c and d) and B-3 (e and f) with different host doping ratios.

Table S1. Contact Angles of the various hosts deposited on a glass substrate

| Material   | Contact angle (deg) |      |
|------------|---------------------|------|
|            | DI water            | EG   |
| PVK        | 81.7                | 50.1 |
| mCP        | 56.8                | 59.5 |
| DpAn-5BzAc | 74.9                | 76.5 |

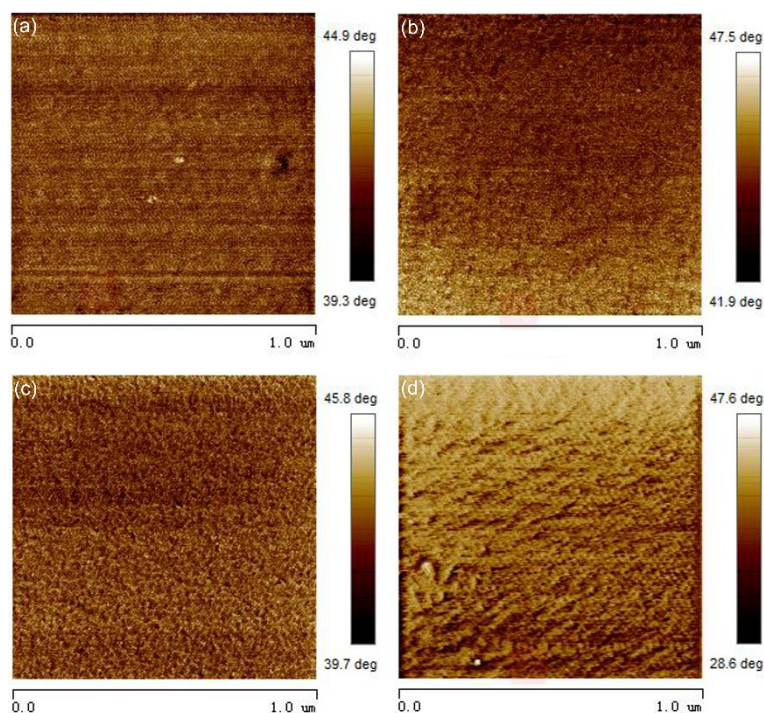

Figure S4. AFM phase images ( $1\ \mu\text{m} \times 1\ \mu\text{m}$ ) of the (a) mCP:DpAn-5BzAc:Ir(ppy)<sub>2</sub>acac; (b) PVK:DpAn-5BzAc:Ir(ppy)<sub>2</sub>acac; (c) PVK:mCP:Ir(ppy)<sub>2</sub>acac and (d) mCP:DpAn-5BzAc:TCTA:Ir(ppy)<sub>2</sub>acac films deposited on glass substrate.

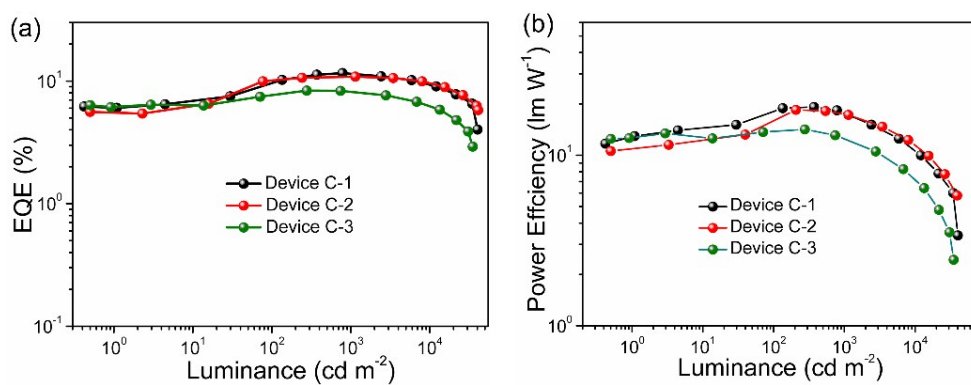

Figure S5. The EQE-L (left) and PE-L (right) characteristics for ternary blend hosts based devices.

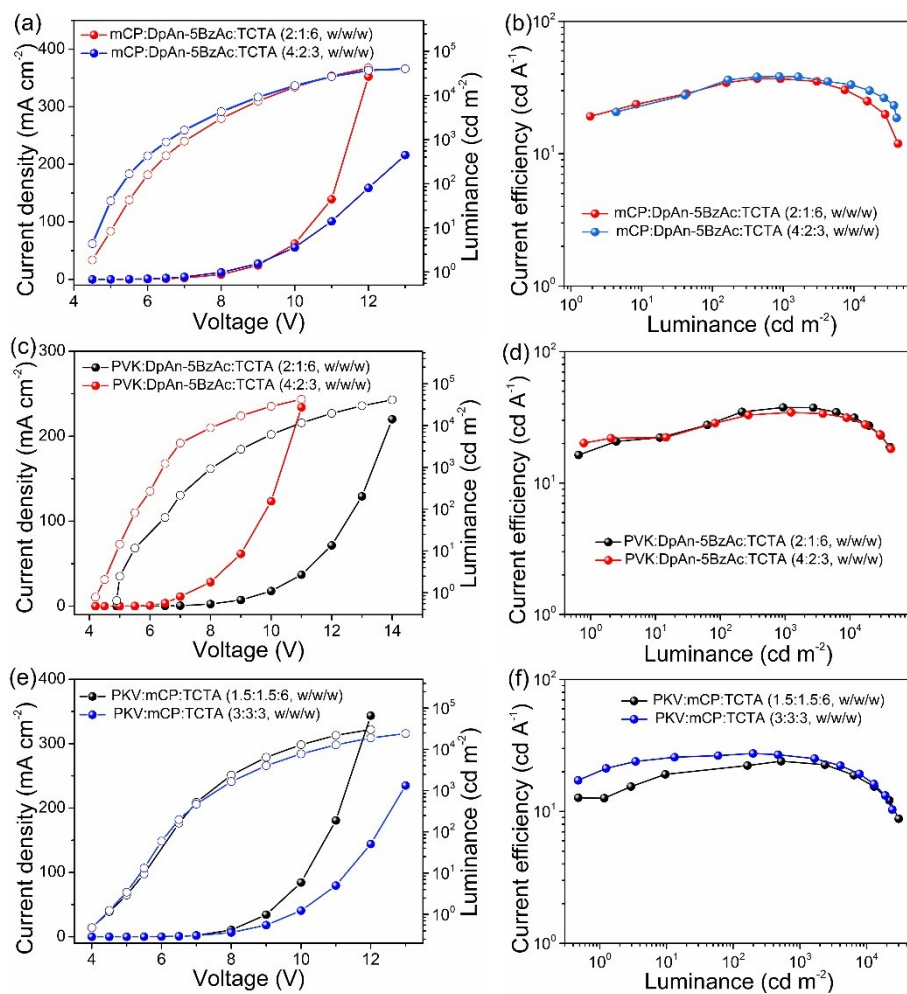

Figure S6. The current density-luminance-voltage (left) and current efficiency versus luminance (right) characteristics for Devices C-1 (a and b), C-2 (c and d) and C-3 (e and f) with different host doping ratios.

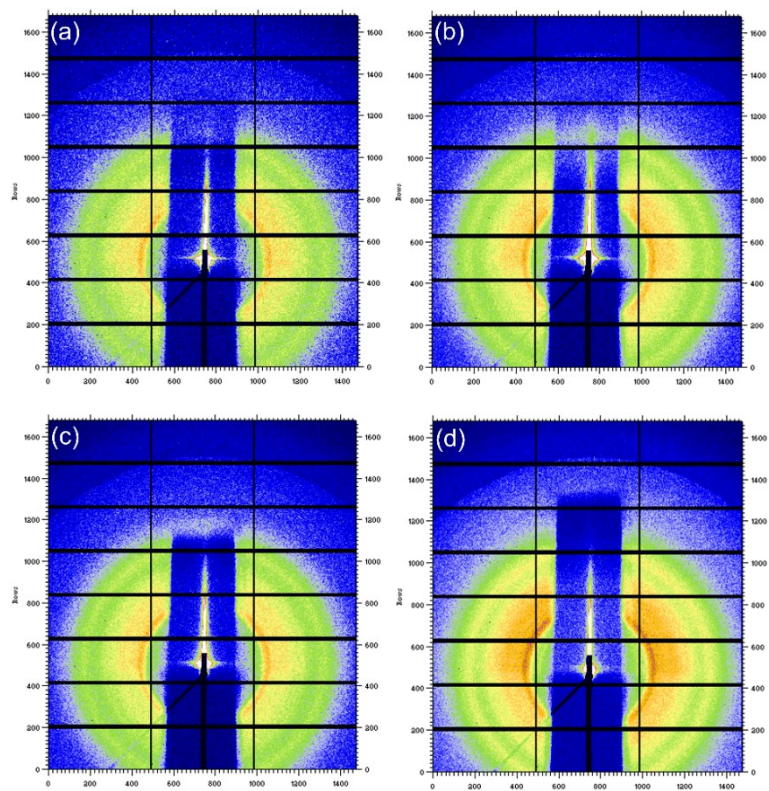

Figure S7. Two-dimensional (2D) GISAXS patterns of (a) mCP:DpAn-5BzAc:Ir(ppy)<sub>2</sub>acac; (b) PVK:DpAn-5BzAc:Ir(ppy)<sub>2</sub>acac; (c) PVK:mCP:Ir(ppy)<sub>2</sub>acac and (d) mCP:DpAn-5BzAc:TCTA:Ir(ppy)<sub>2</sub>acac.
